# Supplementary material for: Therapeutic Effect of Guggulsterone in Primary Cultured Orbital Fibroblasts Obtained From Patients with Graves’ Orbitopathy
Source: PubMed Central journal article supplement — Invest Ophthalmol Vis Sci. 2020 Mar 20;61(3):39. doi: 10.1167/iovs.61.3.39 (PMC7401490; doi:10.1167/iovs.61.3.39), 2020-03-20
Supplement: iovs-61-3-39_s001.pdf [file iovs-61-3-39_s001.pdf]

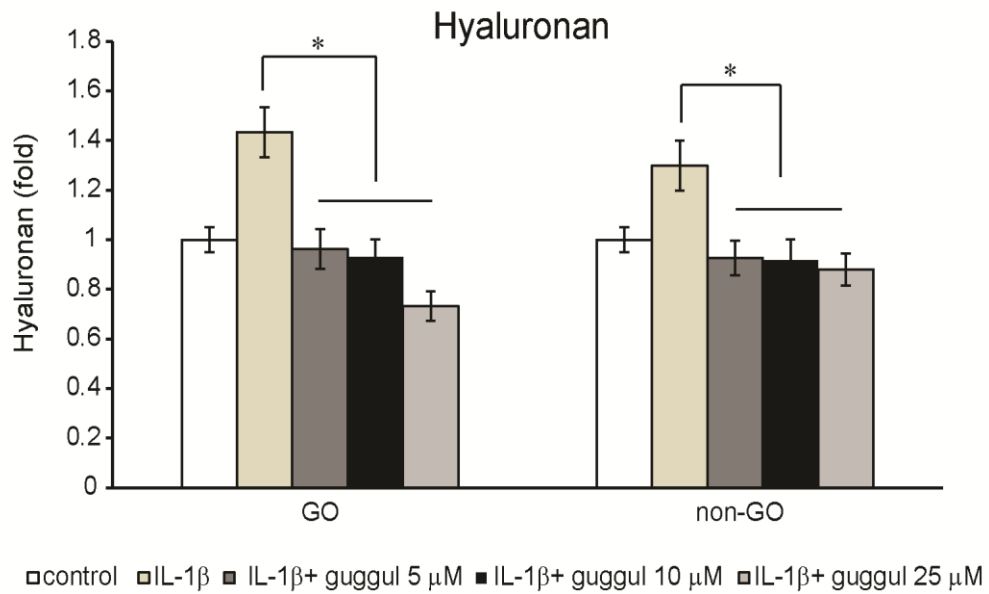

### Supplementary Figure 1

Hyaluronan release (ng/mL) subsequent to treatment with diverse concentrations of GS (5–25  $\mu$ M) for 24 h before stimulation with 10 ng/mL IL-1 $\beta$  for 16 h was measured in GO (n = 3) and non-GO (n = 2) cell samples using ELISA. GS significantly suppressed IL-1 $\beta$ -induced hyaluronan production in a dose-dependent manner in both GO and non-GO cells. Results are presented as the mean  $\pm$  SD fold of hyaluronan production relative to the control in cells from independent experiments with the average of different individuals (\*P < 0.05 versus IL-1 $\beta$ -stimulated cells without GS pretreatment).
